# Supplementary material for: Dendritic organic–inorganic hybrid polyphenol and branched benzoxazine monomers with low curing temperature
Source: Royal Society of Chemistry journal article supplement (doi:10.1039/c4ra07035f), 2014-01-01
Supplement: c4ra07035f1.pdf [file c4ra07035f1.pdf]

## Supporting Information

### Dendritic organic-inorganic hybrid polyphenol and branched benzoxazine monomers with low curing temperature

Min Zhang,<sup>a</sup> Zhi-Wei Tan,<sup>a</sup> Hong-Xia Ma,<sup>a</sup> Jin-Jun Qiu,<sup>a</sup> Cheng-Mei Liu<sup>\*a</sup>

<sup>a</sup>School of Chemistry and Chemical Engineering, Key Laboratory for Large-Format Battery Materials and System, Ministry of Education, Huazhong University of Science and Technology, Wuhan, 430074, China

\*Corresponding author. Tel: 86-27-87559627. E-mail: liukui@mail.hust.edu.cn

#### Synthesis of T1

T1 was prepared according to the reported method<sup>36</sup> with a few modifications. A mixture of  $[\text{N}_3\text{P}_3\text{Cl}_6]$  (8 g, 23 mmol), p-hydroxybenzaldehyde (20.16 g, 165 mmol) and  $\text{K}_2\text{CO}_3$  (34.6 g, 264 mmol) in tetrahydrofuran (60 mL) was heated under reflux for 48 h. The volatile materials were removed by rotary evaporation and the residue was precipitated in hot water, the resulting white solid was filtered off and washed with large amount of hot water, a little ethanol and hexane, and dried in vacuum at 50 °C for 48 h. The crude product was recrystallized from ethyl acetate. White crystals were collected and dried in vacuum at 50 °C for 48 h. (Scheme 1)

Yield: 82%. M.P. = 160-162 °C. <sup>1</sup>H NMR (DMSO-d<sub>6</sub>, TMS, ppm): 6.74-7.78 (Ar-H, 8H, m), 9.48 (CH=N, 1H, s), 8.52(CH=N, 1H, s). <sup>13</sup>C NMR (DMSO-d<sub>6</sub>, TMS, ppm): 156.8 (C-OH), 156.0 (C=N), 151.8 (C-O), 142.7 (C-N), 134.4 (CH), 131.9 (CH), 129.9 (CH), 123.1 (CH), 121.0(C), 116.1 (CH), 115.5 (CH). <sup>31</sup>P NMR (DMSO-d<sub>6</sub>, ppm): 8.75. [Fig. S1-3]

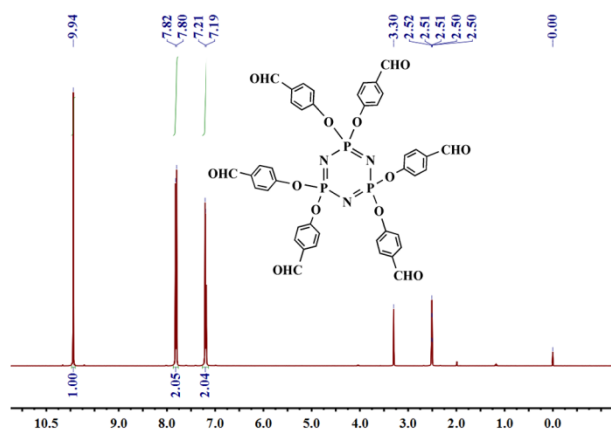

Fig. S1 <sup>1</sup>H NMR spectra of T1 (solvent: DMSO-d<sub>6</sub>)

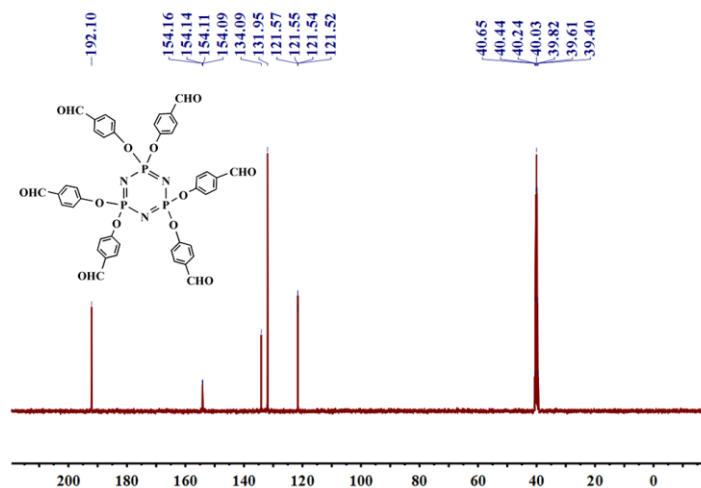

Fig. S2  $^{13}\text{C}$  NMR spectra of T1 (solvent: DMSO-d6)

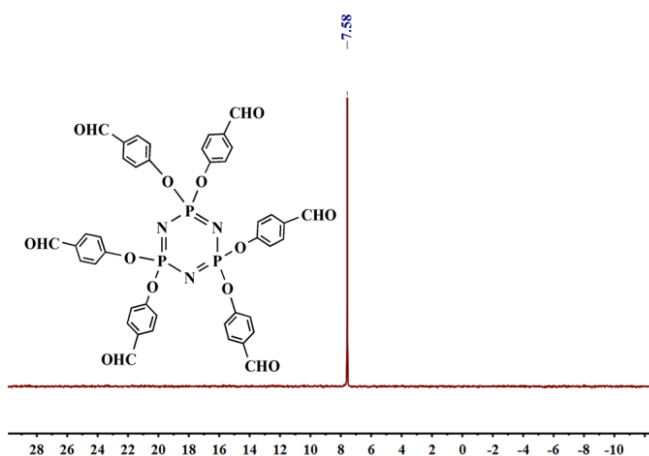

Fig. S3  $^{31}\text{P}$  NMR spectra of T1 (solvent: DMSO-d6)

### Synthesis of dendritic polyphenol T2

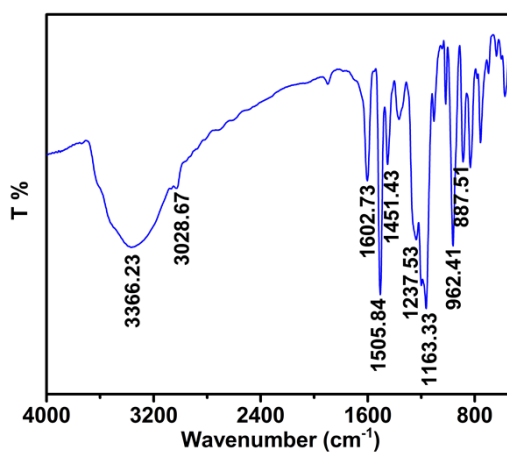

Fig. S4 FT-IR spectrum of T2

IR spectrum of T2 was shown in Fig. S4. The wide peaks around  $3366.2\text{ cm}^{-1}$  attributed to the phenolic groups. The peaks at  $1602.73\text{ cm}^{-1}$ ,  $1505.84\text{ cm}^{-1}$  and  $1451.43\text{ cm}^{-1}$  ascribed to the benzene ring. The peaks at  $1163.33\text{ cm}^{-1}$ ,  $887.51\text{ cm}^{-1}$  and  $962.41\text{ cm}^{-1}$  were due to P=N, P-N and P-O absorption, respectively.<sup>34,35</sup> These results further certified that T2 was successfully prepared.

### Synthesis of branched benzoxazine monomers

Table S1 Different oxazine ring content at given time interval

| reaction<br>time(h) | integral area of protons in T3                                         |                                                                       |                     |                             |
|---------------------|------------------------------------------------------------------------|-----------------------------------------------------------------------|---------------------|-----------------------------|
|                     | ratio of O-CH <sub>2</sub> -N and Ar-H<br>protons in theoretical value | ratio of O-CH <sub>2</sub> -N and Ar-H<br>protons in experiment value | unreacted Ar-<br>OH | oxazine ring<br>content (%) |
| 3                   | 4/20                                                                   | 1.36/20                                                               | 2.81                | 23.6                        |
| 9                   | 4/20                                                                   | 2.11/20                                                               | 2.45                | 40.1                        |
| 15                  | 4/20                                                                   | 2.22/20                                                               | 2.02                | 42.8                        |
| 24                  | 4/20                                                                   | 2.37/20                                                               | 1.70                | 46.6                        |
| 48                  | 4/20                                                                   | 2.89/20                                                               | 2.00                | 60.9                        |
| 60                  | 4/20                                                                   | 2.94/20                                                               | 1.12                | 62.5                        |
| 72                  | 4/20                                                                   | 3.34/20                                                               | 1.17                | 75.2                        |
